# Supplementary material for: Consequences of Domestication on Gut Microbiome: A Comparative Study Between Wild Gaur and Domestic Mithun
Source: Front Microbiol. 2020 Feb 25;11:133. doi: 10.3389/fmicb.2020.00133 (PMC7051944; doi:10.3389/fmicb.2020.00133)
Supplement: Supplementary file 1 [file Table_1.XLSX]

## Sheet: IB_BG_EdgeR_sigOTU_location_new
Supplementary Table S1: Nomenclature and abundances of 91 OTUs identified by Exact test as differing in
their mean abundance between wild and captive individuals. Only highly significant OTUs
(after FDR correction, ≤0.01) are shown and arranged according to increasing log10 fold change (logFC) values. In the column logFC,
OTUs that showed a lower abundance (i.e. mean abundnace) in captive indididuals are marked in green (N= 53), those that
increased in abundance in captives inidividuals are marked in red (N= 38).
* the highest available taxonomic assignment was used. (maximal to the genus level)
OTU	logFC	PValue	FDR	Kingdom	Phylum	Class	Order	Family	Genus	Species	OTUID
OTU636	-11.8975	1.71e-07	6.35e-06	Bacteria	Proteobacteria	Alphaproteobacteria	Rhodobacterales	Rhodobacteraceae	Ruegeria	NA	Ruegeria
OTU829814	-11.5798	4.26e-07	8.44e-06	Bacteria	Proteobacteria	Alphaproteobacteria	Rhodobacterales	Rhodobacteraceae	NA	NA	Rhodobacteraceae*
OTU722628	-11.415	2.26e-07	6.35e-06	Bacteria	Proteobacteria	Alphaproteobacteria	Rhodobacterales	Rhodobacteraceae	NA	NA	Rhodobacteraceae*
OTU562126	-11.1579	2.67e-07	6.35e-06	Bacteria	Proteobacteria	Alphaproteobacteria	Rhodobacterales	Rhodobacteraceae	NA	NA	Rhodobacteraceae*
OTU646866	-11.0332	7.92e-07	1.05e-05	Bacteria	Proteobacteria	Alphaproteobacteria	Rhodobacterales	Rhodobacteraceae	NA	NA	Rhodobacteraceae*
OTU1082059	-10.9149	2.64e-07	6.35e-06	Bacteria	Proteobacteria	Alphaproteobacteria	Sphingomonadales	NA	NA	NA	Sphingomonadales*
OTU57	-10.8434	1.1e-07	5.26e-06	Bacteria	Proteobacteria	Alphaproteobacteria	Rhodobacterales	Rhodobacteraceae	NA	NA	Rhodobacteraceae*
OTU98939	-10.2784	6.24e-07	9.91e-06	Bacteria	Firmicutes	Clostridia	Clostridiales	Clostridiaceae	Clostridium	NA	Clostridium
OTU4303548	-9.89922	6.22e-07	9.91e-06	Bacteria	Firmicutes	Clostridia	Clostridiales	Ruminococcaceae	NA	NA	Ruminococcaceae*
OTU992354	-9.77317	3.65e-07	7.9e-06	Bacteria	Actinobacteria	Actinobacteria	Actinomycetales	Propionibacteriaceae	Propionibacterium	acnes	Propionibacterium
OTU102090	-9.64998	5.67e-07	9.91e-06	Bacteria	Firmicutes	Clostridia	Clostridiales	NA	NA	NA	Clostridiales*
OTU271582	-9.61883	6.93e-07	1.03e-05	Bacteria	SR1	NA	NA	NA	NA	NA	SR1*
OTU301554	-9.56335	7.55e-07	1.05e-05	Bacteria	Actinobacteria	Actinobacteria	Actinomycetales	Nocardioidaceae	NA	NA	Nocardioidaceae*
OTU322729	-9.53636	9.82e-07	1.11e-05	Bacteria	Firmicutes	Clostridia	Clostridiales	Ruminococcaceae	NA	NA	Ruminococcaceae*
OTU1106631	-9.30835	1.59e-06	1.51e-05	Bacteria	Proteobacteria	Alphaproteobacteria	BD7-3	NA	NA	NA	BD7-3*
OTU592117	-9.03363	1.36e-06	1.35e-05	Bacteria	Proteobacteria	Alphaproteobacteria	Rhodobacterales	Rhodobacteraceae	NA	NA	Rhodobacteraceae*
OTU628517	-8.98481	1.2e-06	1.29e-05	Bacteria	Lentisphaerae	[Lentisphaeria]	Victivallales	Victivallaceae	NA	NA	Victivallaceae*
OTU300681	-8.97068	8.78e-07	1.1e-05	Bacteria	Firmicutes	Clostridia	Clostridiales	Ruminococcaceae	NA	NA	Ruminococcaceae*
OTU567410	-8.95964	1.25e-06	1.29e-05	Bacteria	Proteobacteria	Alphaproteobacteria	Rhodobacterales	Rhodobacteraceae	NA	NA	Rhodobacteraceae*
OTU244120	-8.83011	9.63e-07	1.11e-05	Bacteria	Firmicutes	Clostridia	Clostridiales	Ruminococcaceae	NA	NA	Ruminococcaceae*
OTU593824	-8.81169	2.42e-07	6.35e-06	Bacteria	Firmicutes	Clostridia	Clostridiales	Ruminococcaceae	NA	NA	Ruminococcaceae*
OTU65856	-8.71036	1.87e-06	1.65e-05	Bacteria	Firmicutes	Clostridia	Clostridiales	NA	NA	NA	Clostridiales*
OTU304183	-8.27839	5.71e-06	4e-05	Bacteria	Firmicutes	Clostridia	Clostridiales	Ruminococcaceae	NA	NA	Ruminococcaceae*
OTU570385	-7.75842	2.73e-06	2.17e-05	Bacteria	Proteobacteria	Alphaproteobacteria	Rhizobiales	Rhizobiaceae	Agrobacterium	NA	Agrobacterium
OTU52551	-7.49809	1.42e-05	8.32e-05	Bacteria	Firmicutes	Clostridia	Clostridiales	Ruminococcaceae	NA	NA	Ruminococcaceae*
OTU820901	-7.41572	9.17e-06	5.75e-05	Bacteria	Cyanobacteria	4C0d-2	YS2	NA	NA	NA	YS2*
OTU887025	-7.35337	8.54e-09	6.77e-07	Bacteria	Firmicutes	Clostridia	Clostridiales	Ruminococcaceae	NA	NA	Ruminococcaceae*
OTU366584	-7.31412	4.94e-06	3.56e-05	Bacteria	Firmicutes	Clostridia	Clostridiales	Ruminococcaceae	NA	NA	Ruminococcaceae*
OTU25	-7.18995	2.44e-06	2e-05	Bacteria	Firmicutes	Clostridia	Clostridiales	Ruminococcaceae	NA	NA	Ruminococcaceae*
OTU759818	-7.17709	1.61e-05	9.11e-05	Bacteria	Proteobacteria	Alphaproteobacteria	Rhodobacterales	Rhodobacteraceae	NA	NA	Rhodobacteraceae*
OTU341111	-7.14467	3.81e-06	2.83e-05	Bacteria	Cyanobacteria	4C0d-2	YS2	NA	NA	NA	YS2*
OTU286	-6.86297	4.29e-10	5.11e-08	Bacteria	Firmicutes	Bacilli	Bacillales	Planococcaceae	NA	NA	Planococcaceae*
OTU268353	-6.76599	8.35e-06	5.52e-05	Bacteria	Proteobacteria	Alphaproteobacteria	Caulobacterales	Caulobacteraceae	Brevundimonas	diminuta	Brevundimonas
OTU317813	-6.70912	7.2e-05	0.000323509	Bacteria	Firmicutes	Clostridia	Clostridiales	Ruminococcaceae	NA	NA	Ruminococcaceae*
OTU1016465	-6.408	0.000225818	0.000881062	Bacteria	Proteobacteria	Alphaproteobacteria	Rickettsiales	Pelagibacteraceae	NA	NA	Pelagibacteraceae*
OTU1138331	-6.39271	1.82e-05	0.000101009	Bacteria	Tenericutes	Mollicutes	Acholeplasmatales	Acholeplasmataceae	Acholeplasma	NA	Acholeplasma
OTU324386	-6.37689	3.41e-05	0.000168879	Bacteria	Firmicutes	Clostridia	Clostridiales	Lachnospiraceae	Coprococcus	NA	Coprococcus
OTU307638	-6.31982	2.09e-06	1.78e-05	Bacteria	Firmicutes	Clostridia	Clostridiales	Lachnospiraceae	NA	NA	Lachnospiraceae*
OTU72772	-6.31824	3.48e-08	2.07e-06	Bacteria	Firmicutes	Bacilli	Bacillales	Planococcaceae	Lysinibacillus	boronitolerans	Lysinibacillus
OTU115	-6.21039	4.29e-10	5.11e-08	Bacteria	Firmicutes	Bacilli	Bacillales	Planococcaceae	NA	NA	Planococcaceae*
OTU455	-5.78158	1.88e-05	0.000101879	Bacteria	Firmicutes	Clostridia	Clostridiales	Lachnospiraceae	NA	NA	Lachnospiraceae*
OTU1106614	-5.54651	1.43e-05	8.32e-05	Bacteria	Firmicutes	Clostridia	Clostridiales	Lachnospiraceae	NA	NA	Lachnospiraceae*
OTU345871	-5.28465	0.000186797	0.000740963	Bacteria	Firmicutes	Clostridia	Clostridiales	Ruminococcaceae	NA	NA	Ruminococcaceae*
OTU1002005	-5.15641	0.000313938	0.00111518	Bacteria	Actinobacteria	Actinobacteria	Actinomycetales	Micrococcaceae	Arthrobacter	NA	Arthrobacter
OTU120	-4.99652	2.33e-05	0.000123301	Bacteria	Tenericutes	Mollicutes	Anaeroplasmatales	Anaeroplasmataceae	Anaeroplasma	NA	Anaeroplasma
OTU585869	-4.9384	1.38e-05	8.32e-05	Bacteria	Firmicutes	Clostridia	Clostridiales	Clostridiaceae	Clostridium	NA	Clostridium
OTU542096	-4.69888	7.96e-05	0.00035069	Bacteria	Firmicutes	Clostridia	Clostridiales	Lachnospiraceae	NA	NA	Lachnospiraceae*
OTU579431	-4.56409	0.000114247	0.000477031	Bacteria	Firmicutes	Clostridia	Clostridiales	NA	NA	NA	Clostridiales*
OTU367217	-4.56051	0.000415697	0.00143385	Bacteria	Firmicutes	Clostridia	Clostridiales	Ruminococcaceae	NA	NA	Ruminococcaceae*
OTU4378810	-4.18424	0.000743758	0.00249316	Bacteria	Firmicutes	Clostridia	Clostridiales	Ruminococcaceae	NA	NA	Ruminococcaceae*
OTU310760	-3.88499	0.000267911	0.000966104	Bacteria	Firmicutes	Clostridia	Clostridiales	Lachnospiraceae	NA	NA	Lachnospiraceae*
OTU396	-3.332	0.00145532	0.00438439	Bacteria	Firmicutes	Clostridia	Clostridiales	Lachnospiraceae	NA	NA	Lachnospiraceae*
OTU319316	-2.55644	0.00189387	0.00530283	Bacteria	Firmicutes	Clostridia	Clostridiales	Ruminococcaceae	NA	NA	Ruminococcaceae*
OTU4302718	2.21809	0.00214158	0.00585857	Bacteria	Firmicutes	Clostridia	Clostridiales	Ruminococcaceae	NA	NA	Ruminococcaceae*
OTU584765	2.69487	0.00179087	0.00517753	Bacteria	Firmicutes	Clostridia	Clostridiales	Lachnospiraceae	NA	NA	Lachnospiraceae*
OTU578649	2.72865	0.000240356	0.000908012	Bacteria	Firmicutes	Clostridia	Clostridiales	Lachnospiraceae	NA	NA	Lachnospiraceae*
OTU583	2.80048	0.00180561	0.00517753	Bacteria	Firmicutes	Clostridia	Clostridiales	Lachnospiraceae	Anaerostipes	NA	Anaerostipes
OTU4388835	2.80097	0.00113379	0.00350443	Bacteria	Firmicutes	Clostridia	Clostridiales	Ruminococcaceae	NA	NA	Ruminococcaceae*
OTU1146798	2.82548	0.00296749	0.00793555	Bacteria	Firmicutes	Clostridia	Clostridiales	Lachnospiraceae	Epulopiscium	NA	Epulopiscium
OTU354890	2.84075	0.000880231	0.0028698	Bacteria	Firmicutes	Clostridia	Clostridiales	Ruminococcaceae	NA	NA	Ruminococcaceae*
OTU512398	2.9534	0.00117441	0.00358344	Bacteria	Firmicutes	Clostridia	Clostridiales	NA	NA	NA	Clostridiales*
OTU302878	3.04746	0.00192717	0.00533332	Bacteria	Cyanobacteria	4C0d-2	YS2	NA	NA	NA	YS2*
OTU38	3.29621	0.000739798	0.00249316	Bacteria	Firmicutes	Clostridia	Clostridiales	Ruminococcaceae	NA	NA	Ruminococcaceae*
OTU589	3.34476	0.00184242	0.0052202	Bacteria	Proteobacteria	Alphaproteobacteria	RF32	NA	NA	NA	RF32*
OTU798164	3.35011	0.00333414	0.00872005	Bacteria	Firmicutes	Clostridia	Clostridiales	NA	NA	NA	Clostridiales*
OTU524575	3.3529	0.00301057	0.00796128	Bacteria	Firmicutes	Clostridia	Clostridiales	Lachnospiraceae	NA	NA	Lachnospiraceae*
OTU4450088	3.41409	0.00100921	0.00322348	Bacteria	Firmicutes	Clostridia	Clostridiales	Ruminococcaceae	NA	NA	Ruminococcaceae*
OTU288494	3.41749	6.2e-05	0.000289257	Bacteria	Verrucomicrobia	Verrucomicrobiae	Verrucomicrobiales	Verrucomicrobiaceae	Akkermansia	NA	Akkermansia
OTU327049	3.45933	0.00147795	0.00439692	Bacteria	Firmicutes	Clostridia	Clostridiales	Lachnospiraceae	NA	NA	Lachnospiraceae*
OTU353561	3.79749	0.0010158	0.00322348	Bacteria	Firmicutes	Clostridia	Clostridiales	NA	NA	NA	Clostridiales*
OTU523589	3.83698	0.000253089	0.000941175	Bacteria	Firmicutes	Clostridia	Clostridiales	Clostridiaceae	Clostridium	neonatale	Clostridium
OTU188	3.89221	0.00105934	0.0033174	Bacteria	Firmicutes	Clostridia	Clostridiales	Lachnospiraceae	NA	NA	Lachnospiraceae*
OTU567875	3.89309	4.4e-05	0.000213796	Bacteria	Firmicutes	Clostridia	Clostridiales	Lachnospiraceae	Anaerostipes	NA	Anaerostipes
OTU4435303	4.09625	0.00025898	0.000948267	Bacteria	Proteobacteria	Alphaproteobacteria	RF32	NA	NA	NA	RF32*
OTU562379	4.11153	1.73e-06	1.58e-05	Bacteria	Verrucomicrobia	Verrucomicrobiae	Verrucomicrobiales	Verrucomicrobiaceae	Akkermansia	NA	Akkermansia
OTU212228	4.25541	0.00177252	0.00517753	Bacteria	Firmicutes	Clostridia	Clostridiales	Ruminococcaceae	NA	NA	Ruminococcaceae*
OTU528157	4.27521	0.00251833	0.00681095	Bacteria	Firmicutes	Clostridia	Clostridiales	Lachnospiraceae	Coprococcus	NA	Coprococcus
OTU558420	4.50175	9.52e-05	0.000411864	Bacteria	Firmicutes	Clostridia	Clostridiales	Ruminococcaceae	NA	NA	Ruminococcaceae*
OTU584408	4.63344	0.000111679	0.000474637	Bacteria	Firmicutes	Clostridia	Clostridiales	[Mogibacteriaceae]	Mogibacterium	NA	Mogibacterium
OTU571178	4.8113	4.92e-05	0.000234115	Bacteria	Firmicutes	Clostridia	Clostridiales	Lachnospiraceae	Roseburia	NA	Roseburia
OTU303417	4.87433	0.000240144	0.000908012	Bacteria	Firmicutes	Clostridia	Clostridiales	Clostridiaceae	NA	NA	Clostridiaceae*
OTU19	5.24891	0.000754967	0.00249559	Bacteria	Proteobacteria	Alphaproteobacteria	NA	NA	NA	NA	Alphaproteobacteria*
OTU355203	5.26731	0.000126154	0.000517665	Bacteria	Firmicutes	Clostridia	Clostridiales	Ruminococcaceae	NA	NA	Ruminococcaceae*
OTU826624	5.72768	7.17e-05	0.000323509	Bacteria	Firmicutes	Clostridia	Clostridiales	Lachnospiraceae	Coprococcus	NA	Coprococcus
OTU520	5.72906	0.000341269	0.00119444	Bacteria	Firmicutes	Clostridia	Clostridiales	NA	NA	NA	Clostridiales*
OTU4446053	6.23948	6.71e-06	4.57e-05	Bacteria	Proteobacteria	Alphaproteobacteria	NA	NA	NA	NA	Alphaproteobacteria*
OTU433	6.25323	8.64e-06	5.56e-05	Bacteria	Firmicutes	Clostridia	Clostridiales	Clostridiaceae	Clostridium	NA	Clostridium
OTU395	6.29977	2.64e-05	0.000136416	Bacteria	Proteobacteria	Alphaproteobacteria	NA	NA	NA	NA	Alphaproteobacteria*
OTU516159	6.60931	0.000131552	0.000530667	Bacteria	Proteobacteria	Gammaproteobacteria	Aeromonadales	Succinivibrionaceae	Succinivibrio	NA	Succinivibrio
OTU527058	6.96957	3.27e-05	0.000165369	Bacteria	Proteobacteria	Gammaproteobacteria	Aeromonadales	Succinivibrionaceae	Succinivibrio	NA	Succinivibrio
OTU32	7.078	2.91e-06	2.23e-05	Bacteria	Firmicutes	Clostridia	Clostridiales	Ruminococcaceae	Ruminococcus	NA	Ruminococcus
