# Supplementary material for: Consequences of Domestication on Gut Microbiome: A Comparative Study Between Wild Gaur and Domestic Mithun
Source: Front Microbiol. 2020 Feb 25;11:133. doi: 10.3389/fmicb.2020.00133 (PMC7051944; doi:10.3389/fmicb.2020.00133)
Supplement: Supplementary file 2 [file Table_2.XLSX]

## Sheet: IB_FRD_EdgeR_sigOTU_FRD_new2
Supplementary Table S2: Nomenclature and abundances of 68 OTUs identified by Exact test as differing in
their mean abundance between wild and domesticated individuals. Only highly significant OTUs
(after FDR correction, ≤0.01) are shown and arranged according to increasing log10 fold change (logFC) values. In the column logFC,
OTUs that showed a lower abundance (i.e. mean abundnace) in domesticated inidividuals are marked in green (N= 56), those that
increased in abundance in domesticated inidividuals are marked in red (N= 12).
* the highest available taxonomic assignment was used (maximal to the genus level)
OTU	logFC	PValue	FDR	Kingdom	Phylum	Class	Order	Family	Genus	Species	OTUID
OTU636	-13.3142	3.296e-08	1.06807e-06	Bacteria	Proteobacteria	Alphaproteobacteria	Rhodobacterales	Rhodobacteraceae	Ruegeria	NA	Ruegeria
OTU829814	-13.0038	5.1624e-08	1.06807e-06	Bacteria	Proteobacteria	Alphaproteobacteria	Rhodobacterales	Rhodobacteraceae	NA	NA	Rhodobacteraceae*
OTU722628	-12.6853	4.26884e-08	1.06807e-06	Bacteria	Proteobacteria	Alphaproteobacteria	Rhodobacterales	Rhodobacteraceae	NA	NA	Rhodobacteraceae*
OTU646866	-12.6465	5.86853e-08	1.06807e-06	Bacteria	Proteobacteria	Alphaproteobacteria	Rhodobacterales	Rhodobacteraceae	NA	NA	Rhodobacteraceae*
OTU562126	-12.1129	1.1006e-07	1.82099e-06	Bacteria	Proteobacteria	Alphaproteobacteria	Rhodobacterales	Rhodobacteraceae	NA	NA	Rhodobacteraceae*
OTU1082059	-12.0544	5.75184e-08	1.06807e-06	Bacteria	Proteobacteria	Alphaproteobacteria	Sphingomonadales	NA	NA	NA	Sphingomonadales*
OTU57	-11.5516	5.61292e-08	1.06807e-06	Bacteria	Proteobacteria	Alphaproteobacteria	Rhodobacterales	Rhodobacteraceae	NA	NA	Rhodobacteraceae*
OTU98939	-11.2417	1.58346e-07	1.95614e-06	Bacteria	Firmicutes	Clostridia	Clostridiales	Clostridiaceae	Clostridium	NA	Clostridium
OTU4303548	-10.8458	1.9039e-07	1.95614e-06	Bacteria	Firmicutes	Clostridia	Clostridiales	Ruminococcaceae	NA	NA	Ruminococcaceae*
OTU102090	-10.5022	1.93464e-07	1.95614e-06	Bacteria	Firmicutes	Clostridia	Clostridiales	NA	NA	NA	Clostridiales*
OTU992354	-10.4836	1.53835e-07	1.95614e-06	Bacteria	Actinobacteria	Actinobacteria	Actinomycetales	Propionibacteriaceae	Propionibacterium	acnes	Propionibacterium
OTU271582	-10.4724	2.48609e-07	2.15461e-06	Bacteria	SR1	NA	NA	NA	NA	NA	SR1*
OTU322729	-10.391	2.29337e-07	2.08696e-06	Bacteria	Firmicutes	Clostridia	Clostridiales	Ruminococcaceae	NA	NA	Ruminococcaceae*
OTU1106631	-10.3764	3.14515e-07	2.38507e-06	Bacteria	Proteobacteria	Alphaproteobacteria	BD7-3	NA	NA	NA	BD7-3*
OTU301554	-10.0497	3.60937e-07	2.4591e-06	Bacteria	Actinobacteria	Actinobacteria	Actinomycetales	Nocardioidaceae	NA	NA	Nocardioidaceae*
OTU592117	-9.9621	3.64812e-07	2.4591e-06	Bacteria	Proteobacteria	Alphaproteobacteria	Rhodobacterales	Rhodobacteraceae	NA	NA	Rhodobacteraceae*
OTU317813	-9.89016	2.20567e-07	2.08696e-06	Bacteria	Firmicutes	Clostridia	Clostridiales	Ruminococcaceae	NA	NA	Ruminococcaceae*
OTU628517	-9.85586	3.28427e-07	2.39095e-06	Bacteria	Lentisphaerae	[Lentisphaeria]	Victivallales	Victivallaceae	NA	NA	Victivallaceae*
OTU65856	-9.74443	3.01371e-07	2.38476e-06	Bacteria	Firmicutes	Clostridia	Clostridiales	NA	NA	NA	Clostridiales*
OTU567410	-9.68815	4.06753e-07	2.64389e-06	Bacteria	Proteobacteria	Alphaproteobacteria	Rhodobacterales	Rhodobacteraceae	NA	NA	Rhodobacteraceae*
OTU244120	-9.67633	2.85061e-07	2.35823e-06	Bacteria	Firmicutes	Clostridia	Clostridiales	Ruminococcaceae	NA	NA	Ruminococcaceae*
OTU1016465	-9.18994	1.29144e-06	7.12247e-06	Bacteria	Proteobacteria	Alphaproteobacteria	Rickettsiales	Pelagibacteraceae	NA	NA	Pelagibacteraceae*
OTU300681	-9.17358	1.72566e-07	1.95614e-06	Bacteria	Firmicutes	Clostridia	Clostridiales	Ruminococcaceae	NA	NA	Ruminococcaceae*
OTU759818	-8.82665	9.34347e-07	5.66837e-06	Bacteria	Proteobacteria	Alphaproteobacteria	Rhodobacterales	Rhodobacteraceae	NA	NA	Rhodobacteraceae*
OTU820901	-8.7435	1.13059e-06	6.43025e-06	Bacteria	Cyanobacteria	4C0d-2	YS2	NA	NA	NA	YS2*
OTU52551	-8.36979	3.93113e-06	1.78866e-05	Bacteria	Firmicutes	Clostridia	Clostridiales	Ruminococcaceae	NA	NA	Ruminococcaceae*
OTU341111	-8.01915	9.25296e-07	5.66837e-06	Bacteria	Cyanobacteria	4C0d-2	YS2	NA	NA	NA	YS2*
OTU570385	-8.0004	1.84438e-07	1.95614e-06	Bacteria	Proteobacteria	Alphaproteobacteria	Rhizobiales	Rhizobiaceae	Agrobacterium	NA	Agrobacterium
OTU307638	-7.87422	1.14626e-08	5.21547e-07	Bacteria	Firmicutes	Clostridia	Clostridiales	Lachnospiraceae	NA	NA	Lachnospiraceae*
OTU304183	-7.7464	1.4339e-05	5.79932e-05	Bacteria	Firmicutes	Clostridia	Clostridiales	Ruminococcaceae	NA	NA	Ruminococcaceae*
OTU25	-7.73107	1.4749e-06	7.6144e-06	Bacteria	Firmicutes	Clostridia	Clostridiales	Ruminococcaceae	NA	NA	Ruminococcaceae*
OTU593824	-7.65158	6.92276e-06	3.07303e-05	Bacteria	Firmicutes	Clostridia	Clostridiales	Ruminococcaceae	NA	NA	Ruminococcaceae*
OTU366584	-7.50728	7.16966e-06	3.10685e-05	Bacteria	Firmicutes	Clostridia	Clostridiales	Ruminococcaceae	NA	NA	Ruminococcaceae*
OTU268353	-7.24336	1.43007e-06	7.6144e-06	Bacteria	Proteobacteria	Alphaproteobacteria	Caulobacterales	Caulobacteraceae	Brevundimonas	diminuta	Brevundimonas
OTU1002005	-7.02256	1.07999e-06	6.34058e-06	Bacteria	Actinobacteria	Actinobacteria	Actinomycetales	Micrococcaceae	Arthrobacter	NA	Arthrobacter
OTU72772	-6.99054	5.68623e-10	3.44965e-08	Bacteria	Firmicutes	Bacilli	Bacillales	Planococcaceae	Lysinibacillus	boronitolerans	Lysinibacillus
OTU324386	-6.95605	3.44956e-06	1.65216e-05	Bacteria	Firmicutes	Clostridia	Clostridiales	Lachnospiraceae	Coprococcus	NA	Coprococcus
OTU584684	-6.90052	1.13694e-05	4.7028e-05	Bacteria	Firmicutes	Clostridia	Clostridiales	Ruminococcaceae	NA	NA	Ruminococcaceae*
OTU1138331	-6.75537	3.77824e-06	1.76318e-05	Bacteria	Tenericutes	Mollicutes	Acholeplasmatales	Acholeplasmataceae	Acholeplasma	NA	Acholeplasma
OTU115	-6.60354	9.62615e-12	1.75196e-09	Bacteria	Firmicutes	Bacilli	Bacillales	Planococcaceae	NA	NA	Planococcaceae*
OTU286	-6.50982	5.69364e-11	5.18122e-09	Bacteria	Firmicutes	Bacilli	Bacillales	Planococcaceae	NA	NA	Planococcaceae*
OTU345871	-6.37123	8.96019e-06	3.79245e-05	Bacteria	Firmicutes	Clostridia	Clostridiales	Ruminococcaceae	NA	NA	Ruminococcaceae*
OTU585869	-6.30503	1.25609e-07	1.90508e-06	Bacteria	Firmicutes	Clostridia	Clostridiales	Clostridiaceae	Clostridium	NA	Clostridium
OTU1106614	-6.1038	1.59701e-06	7.85558e-06	Bacteria	Firmicutes	Clostridia	Clostridiales	Lachnospiraceae	NA	NA	Lachnospiraceae*
OTU579431	-5.62815	2.00415e-05	7.92946e-05	Bacteria	Firmicutes	Clostridia	Clostridiales	NA	NA	NA	Clostridiales*
OTU396	-5.56278	1.50614e-06	7.6144e-06	Bacteria	Firmicutes	Clostridia	Clostridiales	Lachnospiraceae	NA	NA	Lachnospiraceae*
OTU593733	-5.47915	9.22519e-05	0.000327583	Bacteria	Firmicutes	Clostridia	Clostridiales	NA	NA	NA	Clostridiales*
OTU367217	-5.3377	0.000108561	0.000372795	Bacteria	Firmicutes	Clostridia	Clostridiales	Ruminococcaceae	NA	NA	Ruminococcaceae*
OTU542096	-5.13144	2.10634e-05	8.15645e-05	Bacteria	Firmicutes	Clostridia	Clostridiales	Lachnospiraceae	NA	NA	Lachnospiraceae*
OTU577671	-4.29778	9.35953e-05	0.000327583	Bacteria	TM7	TM7-3	CW040	F16	NA	NA	F16*
OTU455	-4.26761	0.000887606	0.00273804	Bacteria	Firmicutes	Clostridia	Clostridiales	Lachnospiraceae	NA	NA	Lachnospiraceae*
OTU331350	-3.9656	3.06807e-05	0.000116331	Bacteria	TM7	TM7-3	CW040	F16	NA	NA	F16*
OTU237468	-3.84687	0.000985671	0.00298987	Bacteria	Firmicutes	Clostridia	Clostridiales	Lachnospiraceae	Anaerostipes	NA	Anaerostipes
OTU843459	-2.53063	0.000835592	0.00262203	Bacteria	Firmicutes	Clostridia	Clostridiales	Clostridiaceae	NA	NA	Clostridiaceae*
OTU319316	-2.43683	0.00119396	0.00356232	Bacteria	Firmicutes	Clostridia	Clostridiales	Ruminococcaceae	NA	NA	Ruminococcaceae*
OTU340642	-1.979	0.00177983	0.00483475	Bacteria	Firmicutes	Clostridia	Clostridiales	Lachnospiraceae	NA	NA	Lachnospiraceae*
OTU4374114	1.60333	0.00143426	0.0040279	Bacteria	Firmicutes	Clostridia	Clostridiales	Ruminococcaceae	NA	NA	Ruminococcaceae*
OTU294545	1.75782	0.000430995	0.0014262	Bacteria	Firmicutes	Clostridia	Clostridiales	Ruminococcaceae	NA	NA	Ruminococcaceae*
OTU174	1.83587	0.0015291	0.0042166	Bacteria	Firmicutes	Clostridia	Clostridiales	Ruminococcaceae	NA	NA	Ruminococcaceae*
OTU522107	2.31002	0.00254416	0.00680937	Bacteria	Firmicutes	Clostridia	Clostridiales	Lachnospiraceae	NA	NA	Lachnospiraceae*
OTU532771	2.51409	0.00143854	0.0040279	Bacteria	Firmicutes	Clostridia	Clostridiales	Lachnospiraceae	NA	NA	Lachnospiraceae*
OTU676	2.74306	0.00137734	0.00397897	Bacteria	Firmicutes	Clostridia	Clostridiales	Ruminococcaceae	NA	NA	Ruminococcaceae*
OTU805066	2.78717	0.000750087	0.00239501	Bacteria	Firmicutes	Clostridia	Clostridiales	Lachnospiraceae	NA	NA	Lachnospiraceae*
OTU4450088	2.9576	0.00125733	0.00369088	Bacteria	Firmicutes	Clostridia	Clostridiales	Ruminococcaceae	NA	NA	Ruminococcaceae*
OTU562379	3.2674	4.18488e-05	0.000155439	Bacteria	Verrucomicrobia	Verrucomicrobiae	Verrucomicrobiales	Verrucomicrobiaceae	Akkermansia	NA	Akkermansia
OTU288494	3.44962	8.76144e-05	0.000318916	Bacteria	Verrucomicrobia	Verrucomicrobiae	Verrucomicrobiales	Verrucomicrobiaceae	Akkermansia	NA	Akkermansia
OTU545	4.08574	0.0006616	0.0021502	Bacteria	Cyanobacteria	4C0d-2	YS2	NA	NA	NA	YS2*
OTU279	5.39268	0.000382466	0.00128905	Bacteria	Firmicutes	Clostridia	Clostridiales	Ruminococcaceae	NA	NA	Ruminococcaceae*
